## SOFTWARE

# NASQAR: A web-based platform for high-throughput sequencing data analysis and visualization

Ayman Yousif<sup>1</sup>, Nizar Drou<sup>1</sup>, Jillian Rowe<sup>1</sup>, Mohammed Khalfan<sup>2</sup> and Kristin C Gunsalus<sup>1,2\*</sup>

\*Correspondence: [kcg1@nyu.edu](mailto:kcg1@nyu.edu)

<sup>1</sup>NYU Abu Dhabi Center for Genomics & Systems Biology, Division of Biological Sciences, Abu Dhabi, United Arab Emirates

<sup>2</sup>Center for Genomics & Systems Biology, Department of Biology, New York University, 10003 New York, United States

Full list of author information is available at the end of the article

### Abstract

**Background:** As high-throughput sequencing applications continue to evolve, the rapid growth in quantity and variety of sequence-based data calls for the development of new software libraries and tools for data analysis and visualization. Often, effective use of these tools requires computational skills beyond those of many researchers. To ease this computational barrier, we have created a dynamic web-based platform, NASQAR (Nucleic Acid SeQUENCE Analysis Resource).

**Results:** NASQAR offers a collection of custom and publicly available open-source web applications that make extensive use of a variety of R packages to provide interactive data analysis and visualization. The platform is publicly accessible at <http://nasqar.abudhabi.nyu.edu/>. Open-source code is on GitHub at <https://github.com/nasqar/NASQAR>, and the system is also available as a Docker image at <https://hub.docker.com/r/aymanm/nasqarall>. NASQAR is a collaboration between the core bioinformatics teams of the NYU Abu Dhabi and NYU New York Centers for Genomics and Systems Biology.

**Conclusions:** NASQAR empowers non-programming experts with a versatile and intuitive toolbox to easily and efficiently explore, analyze, and visualize their Transcriptomics data interactively. Popular tools for a variety of applications are currently available, including Transcriptome Data Preprocessing, RNA-seq Analysis (including Single-cell RNA-seq), Metagenomics, and Gene Enrichment.

**Keywords:** Transcriptomics; Graphical user interface; Interactive visualization; Exploratory data analysis

### Background

Genomic data has experienced tremendous growth in recent years due to the rapid advancement of Next Generation Sequencing (NGS) technologies [1, 2]. Common applications include transcriptome profiling; de novo genome sequencing; metagenomics; and mapping of genomic variation, transcription factor binding sites, chromatin modifications, chromatin accessibility, and 3D chromatin conformation. Single-cell versions of these (e.g. [3]) and newer methods — such as spatial transcriptomics (e.g. [4]), CRISPR-based screens (e.g. [5]), and multi-modal profiling (simultaneous quantification of proteins and mRNAs, e.g. [6]) — are rapidly proliferating as new technical innovations come on the scene (e.g. [7, 8]). As the volume of data and diversity of applications continue to grow, so does the number of software libraries and tools for the analysis and visualization of these datasets. Many of

the available tools for genomic data analysis require computational experience and lack a graphical user interface (GUI), making them inaccessible to many researchers whose work depends on them. Some of the common challenges include:

- Knowledge and experience in various programming/scripting languages (R, Python, shell, etc.)
- Data munging: pre-processing and reformatting for use with specific tools
- Limited computational resources (cpu, memory, and disk storage)
- Installation of software packages and dependencies. Many required tasks can be time consuming and tedious due to issues such as satisfying software or hardware requirements and resolving software dependencies. In one study [9], almost half (49%) of the published omics software tools that were randomly surveyed were found to be "difficult to install". Moreover, the rapid churn of operating system updates and hardware configurations contributes to the gradual decline of a tool's impact, usability, and lifetime.
- Software tools developed by researchers within academia are usually less "user-friendly", due to either a lack of development resources or a lack of expertise in best practices for software engineering, such as cross-platform compatibility and user interface design [9]. As an example, many of the available R GUI based tools, while featuring very useful and diverse functionality, lack simple error handling and/or informative feedback. This can render the application unmanageable if users cannot easily identify and remedy the causes of such errors.

NASQAR (Nucleic Acid SeQUENCE Analysis Resource) is a web-based platform that wraps popular high-level analysis and visualization tools in an intuitive and appealing interface. This platform addresses the above challenges by offering the following:

- Utilization of software and interface design best practices to craft user-friendly and intuitive tools that are based on commonly used analysis packages. This is important in order to lower the entry barrier to standard bioinformatics analysis and visualization workflows, thus providing greater independence for researchers with little or no programming experience. The platform may be used for QC, exploratory analysis, or production of publication-ready data files (such as normalized counts data) and figures (PCA plots, heatmaps, dendograms, UMAP/t-SNE etc.)
- A scalable virtualization architecture that is relatively simple to deploy on a personal computer, an organization's private/public web servers, or on the cloud (AWS, Microsoft Azure, Google Cloud, etc.). Virtualization allows for the abstraction of software and operating system dependencies, thus alleviating difficulties in installation for end users. The scalable design is advantageous when deploying the platform online for multiple concurrent users, either for public use or internal use within a research facility. It uses open-source packages, which is particularly desirable for academic research institutions.
- Modular design of analysis categories. By decoupling data preprocessing, RNA-seq analysis, and gene enrichment applications from each other, users

can leverage these functions independently, thus allowing a greater versatility of analysis steps than fully integrated workflows.

The NASQAR platform provides a highly accessible, scalable, and user-friendly framework for versatile data analysis, comprising a consolidated toolbox of publicly available open-source applications (curated and vetted for good value and design) and custom applications developed in-house. While many useful web-based bioinformatics applications are now available, most focus exclusively on one type of analysis or application (e.g. bulk or single-cell RNA-seq, metagenomics, etc.) A few examples – some of which are included in NASQAR – include START[10], DEApp [11], TCC-GUI[12], Shiny-seq[13], GENAVi, is-CellR[14], and Shaman[15]. Fully integrated end-to-end analysis workflows such as GENAVi [16] employ a variety of R packages and/or other tools to streamline consecutive sequence analysis tasks (e.g. from preprocessing all the way to gene enrichment). While often desirable, this approach also restricts the end-user from performing just one of the implemented functions (such as gene enrichment), which is particularly useful for datasets generated independently using other tools or by external collaborators. NASQAR takes a different approach, aiming instead to empower non-programming experts with a “Swiss army knife” to perform a variety of sequence analysis tasks on their own. These may be accessed either as independent units or sequentially, with convenient interfaces to commonly used R data analysis packages and functions. This flexible framework offers a model resource for the community that can be extended to a broader range of applications through further development and collaboration.

## Implementation

The architecture of the NASQAR web platform is illustrated in Figure 1. NASQAR has been deployed on a cluster of virtual machines and is publicly accessible at <http://nasqar.abudhabi.nyu.edu/>. Docker [17] and Swarm provide containerization and cluster management, and the Traefik reverse proxy / load balancer (<https://traefik.io/>) manages requests and maintains sticky user sessions, which is essential in hosting Shiny applications for concurrent users. The scalable design makes it relatively easy to increase dedicated resources simply by adding more nodes to the Docker Swarm cluster, and thus to flexibly accommodate growth in computational demand as new applications are deployed and the user base expands.

A Docker image of NASQAR is publicly available through DockerHub and can be used to deploy the application seamlessly on any system, whether a local computer or a public or private internet server (such as a research institute’s intranet). Although data uploaded online for analysis with NASQAR (at <http://nasqar.abudhabi.nyu.edu/>) is by default discarded after a user’s session ends, this does not guarantee total data privacy. Where privacy is a concern (e.g. patient data), NASQAR may be deployed on either a restricted intranet or a personal computer. Moreover, using Docker allows deployment of the entire NASQAR toolbox with a one-time install, removing the hassle of having to manually satisfy the different software requirements of numerous individual applications. The source

code is publicly available on GitHub and is actively maintained. Each individual application is hosted in its own GitHub repository and can be accessed and launched independently via R or R Studio. All applications have clear user guides with example data sets to help users get started and acclimate quickly. This is a major factor in improving usability and thus adoption of the tools.

NASQAR's collection of applications is primarily implemented in R, a widely used and freely available statistical programming language [18]. Most of the analysis workflows are built using R libraries for genomics and computation. The front-end design employs several R libraries, such as Shiny[19], shinydashboard, shinyjs, shinyBS, shinycssloaders. These libraries and custom Javascript/CSS/HTML enhancements improve the user experience and overall usability with interface consistency, visual clarity, and ease of navigation. Familiar R packages used to build the applications include dplyr and tidyr for matrix data manipulation; ggplot2, heatmaply, and NMF for figure plotting; and BiocParallel for multi-threading support. Additional packages used in conjunction with specific tools are indicated below.

In addition to previously published software, we introduce several new applications we have developed that wrap around popular analysis packages, such as DESeq2 [20] and Seurat [21, 22] for bulk and single-cell RNA-seq analysis and visualization. Since most NASQAR applications require a matrix of gene counts as input, we have also built a convenient tool to assist with pre-processing, GeneCountMerger. Some of the applications provide a seamless transition from data pre-processing to downstream analysis. This implementation gives users the option of using multiple analysis applications without having to modify/reformat the input data set, thus allowing them to easily benchmark and compare the performance of different analysis software packages.

## Results and Discussion

NASQAR currently hosts tools for merging gene counts; conversion of gene IDs to gene names; and analysis of differential mRNA expression, gene function enrichment, and metagenomic profiling. Packages for bulk RNA-seq analysis include DESeq2, edgeR[23], and limma[24], while single-cell analysis is driven by Seurat. The Supplementary Materials include details on available applications along with example use cases. We believe the custom applications developed for NASQAR improve on several existing tools, as highlighted in the following application summaries.

### *GeneCountMerger*

This preprocessing tool is used to merge individual raw gene count files produced from software such as htseq-count [25] or featurecounts [26] (Figure 2). Options include:

- Merge individual sample count files into one matrix
- Merge multiple raw count matrices
- Convert Ensembl gene IDs to gene names
- Select from available genomes / versions
- Add pseudocounts
- Rename sample column headers

- Download merged counts file in .csv format
- Seamless transcriptome analysis following merging counts (Seurat Wizard for single-cell RNA analysis; DESeq2Shiny or START [10] for bulk RNA analysis)

### *Seurat Wizards*

Seurat Wizards are wizard-style web-based interactive applications to perform guided single-cell RNA-seq data analysis and visualization using Seurat, a popular R package designed for QC, analysis, and exploration of single-cell RNA-seq data (Figure 3). The design and implementation of the wizards offer an intuitive way to tune the analysis interactively by allowing users to inspect and visualize the output of intermediate steps and adjust parameters accordingly. In contrast, most web-based tools for scRNA-seq analysis, such as IS-CellR [14] and SCHNAPPs (<https://c3bi-pasteur-fr.github.io/UTechSCB-SCHNAPPs/>), provide integrated solutions that offer less opportunity for user intervention at intermediate steps. Some of the distinctive features of the wizards include, 1) allowing users to visually inspect the distribution of cells using violin plots and to select cut-off thresholds accordingly in order to filter out cells before starting the analysis, 2) Elbow/Jackstraw plots that assist the users in determining what dimensions to use for non-linear reduction. Both of these features can have significant consequences on downstream steps like clustering and differential analysis.

The Seurat Wizards follow closely the Seurat Guided Clustering Tutorials devised by the Seurat authors ([https://satijalab.org/seurat/v3.0/pbmc3k\\_tutorial.html](https://satijalab.org/seurat/v3.0/pbmc3k_tutorial.html)). Both Seurat versions 2 and 3 are currently supported. Users can follow the tutorials while using the Wizards and edit parameters at almost every step, which is instrumental in producing accurate results. Pre-processing (QC/filtering), normalization, dimensionality reduction, clustering (UMAP/t-SNE), and differential expression (cluster biomarkers) are all supported. To enhance the user experience and learning process, the wizards progress step-wise through the workflow. Sequential processing steps become available sequentially upon completion of each preceding task, thus avoiding visual clutter and focusing the user's attention on the task at hand. One of the unique features of the Seurat Wizards is that they can accept as input either processed 10X Genomics data files or a matrix of gene counts, which eliminates the need for an additional pre-processing step.

SeuratV3Wizard integrates several additional features like the UCSC Cell Browser (<https://github.com/maximilianh/cellBrowser>), which enables users to interactively visualize clusters and gene markers. Additional cell browser options will be implemented in future releases where feasible. It also includes the newly published sctransform method [27], which offers users the convenience of running an analysis using two slightly different workflows and comparing the results. We believe these differences in features and design give the Seurat Wizards more versatility and improve usability in comparison with other publicly available implementations.

### *DESeq2Shiny*

The DESeq2Shiny app is a Shiny wrapper around DESeq2, a popular R package for performing differential mRNA expression analysis of RNA-seq data (Figure 4). This web-based application provides functions for data normalization, transformation

(e.g., `rlog` and `vst` for clustering), and estimation of dispersion and log fold-change. The results are all downloadable in csv format. Data visualizations include MA plots, heatmaps, dendograms, gene expression boxplots, and PCA.

The application is capable of working with simple experimental designs or complex experiments with multiple factors. For single-factor experiments with replicates, sample names can be parsed and grouped automatically given proper formatting. The experimental design table and formula can also be generated autonomously. For multifactor experiments, the table can be constructed easily within the "Edit Conditions" page, or an experiment design metadata (csv) file may be uploaded directly. The design formula expresses how the counts for each gene depend on the factor(s) and is editable within the "Edit Conditions" page. This gives users the option to specify experimental designs with multiple variables (e.g. `-group + condition`) and interaction terms (e.g. `-genotype + treatment + genotype : treatment`). In cases where no replicates exist, exploratory analysis (with no differential testing) may be performed by setting the formula to `~1` (which signifies "no design"). Most other surveyed R Shiny applications for RNAseq analysis (e.g. START, DEApp, TCC-GUI, and Shiny-seq) lack such flexible features. For example, they either do not allow the analysis to go forward for experiments with no replicates, or they cannot handle such a scenario and crash with no informative feedback.

The DESeq2Shiny app interface design follows the same implementation as other apps on NASQAR: users are guided through the analysis, and subsequent steps become available when the current step is completed and valid. Users may also fine tune analysis parameters interactively. This design, coupled with preloaded example datasets for single or multi-factor designs, aims to improve ease of use. Known batch effects can be modeled simply by adding the batch as a factor in the design matrix and formula. While the application currently does not handle hidden batch effects, a future release will aim to address this by integrating with other R packages that detect and remove hidden batch effects.

### *ClusterProfShiny*

The ClusterProfilerShiny apps wrap the popular clusterProfiler [28] package, which implements methods to analyze and visualize functional profiles of genomic coordinates, genes, and gene clusters (Figure 5). Users can upload their own data from the output of DESeq2, for example, or import analyzed data from the upstream DESeq2Shiny app. These apps allow for quick and easy over-representation analysis (ORA) and gene set enrichment analysis (GSEA) of GO terms and KEGG pathways. Visuals produced include dot plots, word clouds, category net plots, enrichment map plots, GO induced graphs, GSEA plots, and enriched KEGG pathway plots using the Pathview [29] package.

### Other open-source apps

- **START**: a web-based RNA-seq analysis and visualization resource using edgeR and limma-voom. We have modified this application slightly from the published version to add options to some plots. We have also integrated it with GeneCountMerger so that once merging gene counts is complete, users may launch the START app and have their merged matrix data loaded automatically.



- **DEApp** [11]: an interactive web application for differential expression analysis using DESeq2, edgeR, limma-voom.
- **Shaman** [15]: a Shiny application that enables the identification of differentially abundant genera within metagenomic datasets. It wraps around the Generalized Linear Model implemented in DESeq2. It includes multiple visualizations and is compatible with common metagenomic file formats.

#### Future work

NASQAR is being actively developed to improve and expand its functionality. For current applications, several feature enhancements are planned or in progress. These include adding support for handling of hidden batch effects in DESeq2shiny and, for SeuratV3Wizard, merging scRNA datasets and additional options for dimensionality reduction and visualization. For applications such as DESeq2shiny, SeuratV3Wizard, and ClusterProfiler(ORA/GSEA), an R script containing the executed code and results of an analysis can be generated automatically, thus allowing inspection of the specific packages, commands, and parameters used. This will help users learn to understand their workflows in greater depth and will foster collaboration between experimental and computational biologists. We are also working to improve error handling for all NASQAR apps and to provide more online documentation for different use cases. In addition, we are continuously exploring options to include new analysis and visualization categories, for example variant discovery, small RNA-seq, and data from single-molecule long-read platforms. Finally, we are testing NASQAR on cloud computing platforms (e.g. AWS, Google Cloud) in order to facilitate broader deployment and ease of access.

## Conclusion

The NASQAR platform offers a publicly available, comprehensive toolbox of interactive bioinformatics and visualization applications for sequence analysis that is accessible to all researchers with or without computational experience. It can be used online through the NASQAR web portal or deployed privately on a personal computer or as a shared resource. NASQAR is under active development and will continue to offer user support and feature enhancements with future releases.

## Abbreviations

NASQAR: Nucleic Acid SeQuence Analysis Resource; RNA-seq: RNA sequencing; NGS: Next Generation Sequencing; CRISPR: Clustered Regularly Interspaced Short Palindromic Repeats; GUI: Graphical User Interface; PCA: Principal Components Analysis; t-SNE: t-Distributed Stochastic Neighbor Embedding; UMAP: Uniform Manifold Approximation and Projection; QC: Quality Control; UCSC: University of California, Santa Cruz; rlog: regularized logarithm transformation; vst: variance stabilizing transformation; ORA: Over-Representation Analysis; GSEA: Gene Set Enrichment Analysis; GO: Gene Ontology; KEGG: Kyoto Encyclopedia of Genes and Genomes; START: Shiny Transcriptome Analysis Resource Tool; Shaman: SHiny application for Metagenomic ANalysis; csv: comma separated values

## Availability and requirements

**Project name:** NASQAR

**Project home page:** <https://github.com/nasqar/NASQAR>

**Operating system(s):** Platform independent

**Programming language:** R, JavaScript

**Other requirements:** Docker (version  $\geq$  17.03.0-ce)

**License:** GNU GPL.

**Any restrictions to use by non-academics:** none

## Declarations

### Ethics approval and consent to participate

Not applicable.

### Consent for publication

Not applicable.

### Availability of data and materials

NASQAR is publicly accessible at <http://nasqar.abudhabi.nyu.edu/>. The platform is available as a Docker image at <https://hub.docker.com/r/aymanm/nasqarall>. NASQAR is open-source and the code is available through GitHub:

NASQAR (main page): <https://github.com/nasqar/NASQAR>

SeuratV3Wizard (scRNA): <https://github.com/nasqar/seuratv3wizard>

SeuratWizard (scRNA): <https://github.com/nasqar/SeuratWizard>

deseq2shiny (Bulk RNA): <https://github.com/nasqar/deseq2shiny>

GeneCountMerger (Pre-processing): <https://github.com/nasqar/GeneCountMerger>

ClusterProfShinyGSEA (Enrichment): <https://github.com/nasqar/ClusterProfShinyGSEA>

ClusterProfShinyORA (Enrichment): <https://github.com/nasqar/ClusterProfShinyORA>

### Competing interests

The authors declare that they have no competing interests.

### Funding

This work was supported by a grant from the NYU Abu Dhabi Research Institute to the NYU Abu Dhabi Center for Genomics and Systems Biology (CGSB).

### Author's contributions

AY carried out the interface design and software development. ND defined platform requirements, contributed scripts and performed extensive software testing. JR contributed to the platform architecture design. MK contributed to the development of enrichment applications and provided guidance and extensive software testing. KCG supervised the project. All authors contributed to writing the manuscript. All authors approved the final version of the manuscript.

### Acknowledgements

The authors thank all the faculty and researchers in the NYU Abu Dhabi CGSB and Division of Biology for their excellent feedback, which has motivated the development of NASQAR. The authors would also like to acknowledge David Gresham and Siyu Sun (NYU New York CGSB) for their guidance during the development of the enrichment applications.

This research was carried out on the High Performance Computing resources at New York University Abu Dhabi. We extend special thanks to Fayizal Kunhi, NYU Abu Dhabi HPC.

### Author details

<sup>1</sup>NYU Abu Dhabi Center for Genomics & Systems Biology, Division of Biological Sciences, Abu Dhabi, United Arab Emirates. <sup>2</sup>Center for Genomics & Systems Biology, Department of Biology, New York University, 10003 New York, United States.

### References

1. Goodwin, S., McPherson, J.D., McCombie, W.R.: Coming of age: ten years of next-generation sequencing technologies. *Nature Reviews Genetics* **17**, 333 (2016)
2. Wetterstrand, K.: DNA Sequencing Costs: Data from the NHGRI Genome Sequencing Program (GSP). Accessed on 07.08.2019. <https://www.genome.gov/sequencingcostsdata>
3. Zheng, M., Tian, S.Z., Capurso, D., Kim, M., Maurya, R., Lee, B., Piecuch, E., Gong, L., Zhu, J.J., Li, Z., Wong, C.H., Ngan, C.Y., Wang, P., Ruan, X., Wei, C.-L., Ruan, Y.: Multiplex chromatin interactions with single-molecule precision. *Nature* **566**(7745), 558–562 (2019)
4. Ståhl, P.L., Salmén, F., Vickovic, S., Lundmark, A., Navarro, J.F., Magnusson, J., Giacomello, S., Asp, M., Westholm, J.O., Huss, M., Mollbrink, A., Linnarsson, S., Codeluppi, S., Borg, Å., Pontén, F., Costea, P.I., Sahlén, P., Mulder, J., Bergmann, O., Lundeberg, J., Frisén, J.: Visualization and analysis of gene expression in tissue sections by spatial transcriptomics. *Science* **353**(6294), 78–82 (2016)



- Canver, M.C., Haeussler, M., Bauer, D.E., Orkin, S.H., Sanjana, N.E., Shalem, O., Yuan, G.-C., Zhang, F., Concordet, J.-P., Pinello, L.: Integrated design, execution, and analysis of arrayed and pooled crispr genome-editing experiments. *Nature Protocols* **13**, 946 (2018)
- Stoeckius, M., Hafemeister, C., Stephenson, W., Houck-Loomis, B., Chattopadhyay, P.K., Swerdlow, H., Satija, R., Smibert, P.: Simultaneous epitope and transcriptome measurement in single cells. *Nature Methods* **14**, 865 (2017)
- Stuart, T., Satija, R.: Integrative single-cell analysis. *Nature Reviews Genetics* **20**(5), 257–272 (2019)
- Mimitou, E.P., Cheng, A., Montalbano, A., Hao, S., Stoeckius, M., Legut, M., Roush, T., Herrera, A., Papalexi, E., Ouyang, Z., Satija, R., Sanjana, N.E., Koralov, S.B., Smibert, P.: Multiplexed detection of proteins, transcriptomes, clonotypes and crispr perturbations in single cells. *Nature Methods* **16**(5), 409–412 (2019)
- Mangul, S., Martin, L.S., Eskin, E., Blekhman, R.: Improving the usability and archival stability of bioinformatics software. *Genome Biology* **20**(1), 47 (2019)
- Sklenar, J., Nelson, J.W., Minnier, J., Barnes, A.P.: The START App: a web-based RNAseq analysis and visualization resource. *Bioinformatics* **33**(3), 447–449 (2016)
- Li, Y., Andrade, J.: Deapp: an interactive web interface for differential expression analysis of next generation sequence data. *Source Code for Biology and Medicine* **12**(1), 2 (2017)
- Su, W., Sun, J., Shimizu, K., Kadota, K.: Tcc-gui: a shiny-based application for differential expression analysis of rna-seq count data. *BMC Research Notes* **12**(1), 133 (2019). doi:[10.1186/s13104-019-4179-2](https://doi.org/10.1186/s13104-019-4179-2)
- Sundararajan, Z., Knoll, R., Hombach, P., Becker, M., Schultze, J.L., Ulas, T.: Shiny-seq: advanced guided transcriptome analysis. *BMC Research Notes* **12**(1), 432 (2019). doi:[10.1186/s13104-019-4471-1](https://doi.org/10.1186/s13104-019-4471-1)
- Patel, M.V.: iS-CellR: a user-friendly tool for analyzing and visualizing single-cell RNA sequencing data. *Bioinformatics* **34**(24), 4305–4306 (2018)
- Quereda, J.J., Dussurget, O., Nahori, M.-A., Ghozlane, A., Volant, S., Dillies, M.-A., Regnault, B., Kennedy, S., Mondot, S., Villoing, B., Cossart, P., Pizarro-Cerda, J.: Bacteriocin from epidemic listeria strains alters the host intestinal microbiota to favor infection. *Proceedings of the National Academy of Sciences* **113**(20), 5706–5711 (2016)
- Reyes, A.L.P., Silva, T.C., Coetzee, S.G., Plummer, J.T., Davis, B.D., Chen, S., Hazelett, D.J., Lawrenson, K., Berman, B.P., Gayther, S.A., Jones, M.R.: Genavi: a shiny web application for gene expression normalization, analysis and visualization. *BMC Genomics* **20**(1), 745 (2019). doi:[10.1186/s12864-019-6073-7](https://doi.org/10.1186/s12864-019-6073-7)
- Merkel, D.: Docker: Lightweight linux containers for consistent development and deployment. *Linux J.* **2014**(239) (2014)
- R Core Team: R: A Language and Environment for Statistical Computing. R Foundation for Statistical Computing, Vienna, Austria (2017). R Foundation for Statistical Computing. <https://www.R-project.org/>
- Chang, W., Cheng, J., Allaire, J., Xie, Y., McPherson, J.: Shiny: Web Application Framework for R. (2018). R package version 1.1.0. <https://CRAN.R-project.org/package=shiny>
- Love, M.I., Huber, W., Anders, S.: Moderated estimation of fold change and dispersion for rna-seq data with deseq2. *Genome Biology* **15**, 550 (2014)
- Butler, A., Hoffman, P., Smibert, P., Papalexi, E., Satija, R.: Integrating single-cell transcriptomic data across different conditions, technologies, and species. *Nature Biotechnology* **36**, 411 (2018)
- Stuart, T., Butler, A., Hoffman, P., Hafemeister, C., Papalexi, E., Mauck, W.M.I., Hao, Y., Stoeckius, M., Smibert, P., Satija, R.: Comprehensive integration of single-cell data. *Cell* **177**(7), 1888–1902 (2019)
- Robinson, M.D., McCarthy, D.J., Smyth, G.K.: edgeR: a Bioconductor package for differential expression analysis of digital gene expression data. *Bioinformatics* **26**(1), 139–140 (2009). doi:[10.1093/bioinformatics/btp616](https://doi.org/10.1093/bioinformatics/btp616). <http://oup.prod.sis.lan/bioinformatics/article-pdf/26/1/139/443156/btp616.pdf>
- Ritchie, M.E., Phipson, B., Wu, D., Hu, Y., Law, C.W., Shi, W., Smyth, G.K.: limma powers differential expression analyses for RNA-sequencing and microarray studies. *Nucleic Acids Research* **43**(7), 47–47 (2015). doi:[10.1093/nar/gkv007](https://doi.org/10.1093/nar/gkv007). <http://oup.prod.sis.lan/nar/article-pdf/43/7/e47/7207289/gkv007.pdf>
- Anders, S., Pyl, P.T., Huber, W.: HTSeq—a Python framework to work with high-throughput sequencing data. *Bioinformatics* **31**(2), 166–169 (2014)
- Smyth, G.K., Shi, W., Liao, Y.: featureCounts: an efficient general purpose program for assigning sequence reads to genomic features. *Bioinformatics* **30**(7), 923–930 (2013)
- Hafemeister, C., Satija, R.: Normalization and variance stabilization of single-cell rna-seq data using regularized negative binomial regression. *bioRxiv* (2019)
- Yu, G., Wang, L.-G., Han, Y., He, Q.-Y.: clusterProfiler: an r package for comparing biological themes among gene clusters. *OMICS: A Journal of Integrative Biology* **16**(5), 284–287 (2012)
- Luo, W., Brouwer, C.: Pathview: an R/Bioconductor package for pathway-based data integration and visualization. *Bioinformatics* **29**(14), 1830–1831 (2013)

## Additional Files

Additional file 1 — SupplementaryMaterials-NASQAR-final.pdf

This file includes supplementary materials such as instructions on how to launch NASQAR and example use cases on data analysis and visualization.

## Figures

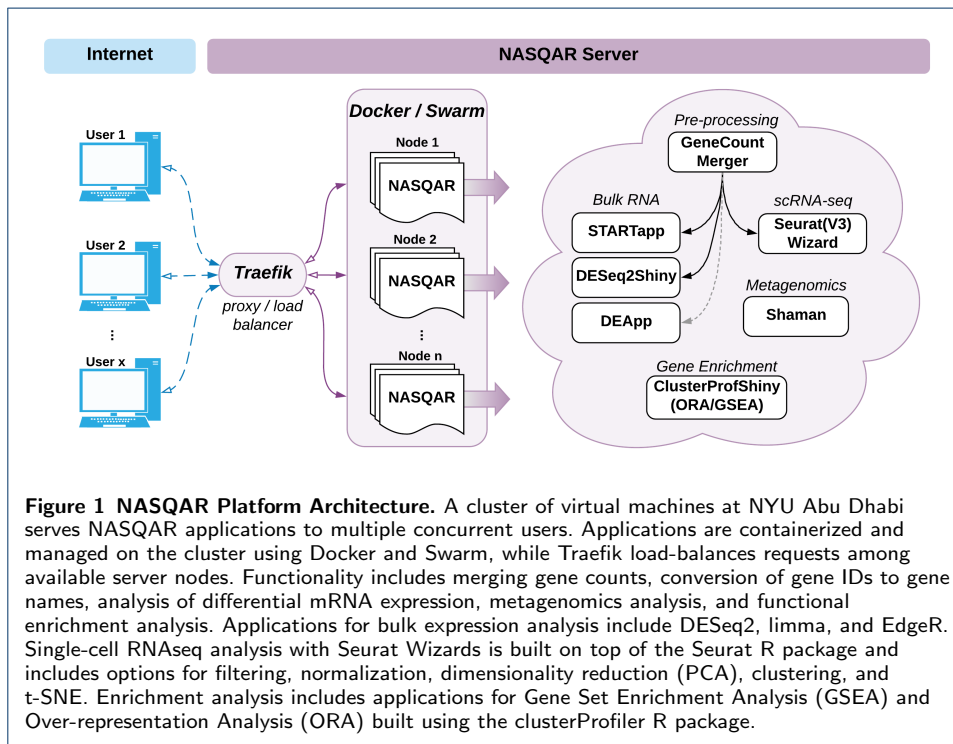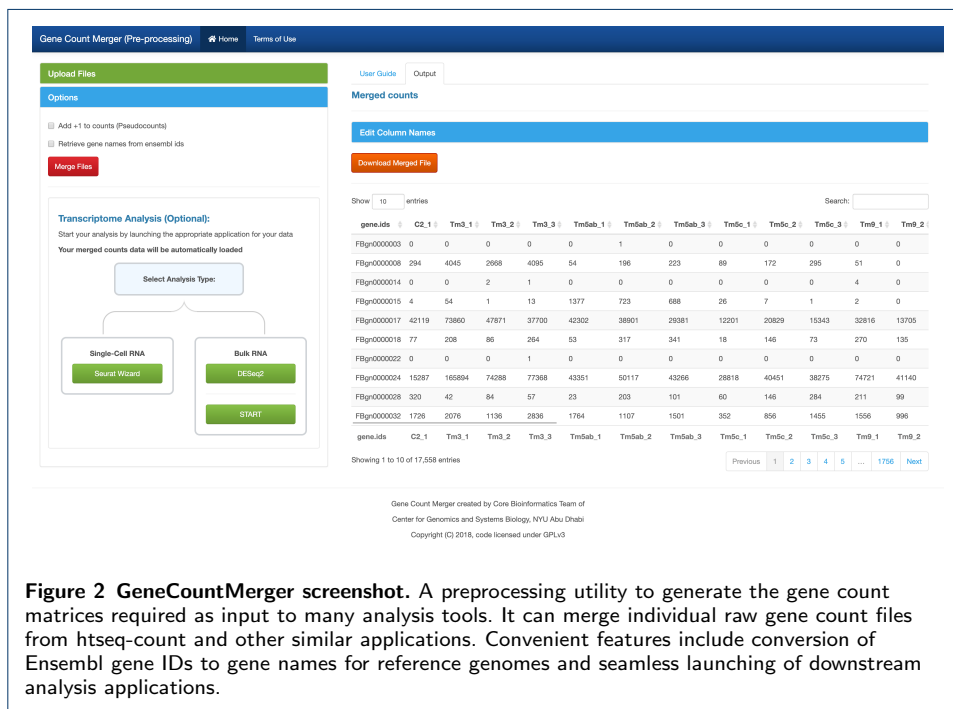

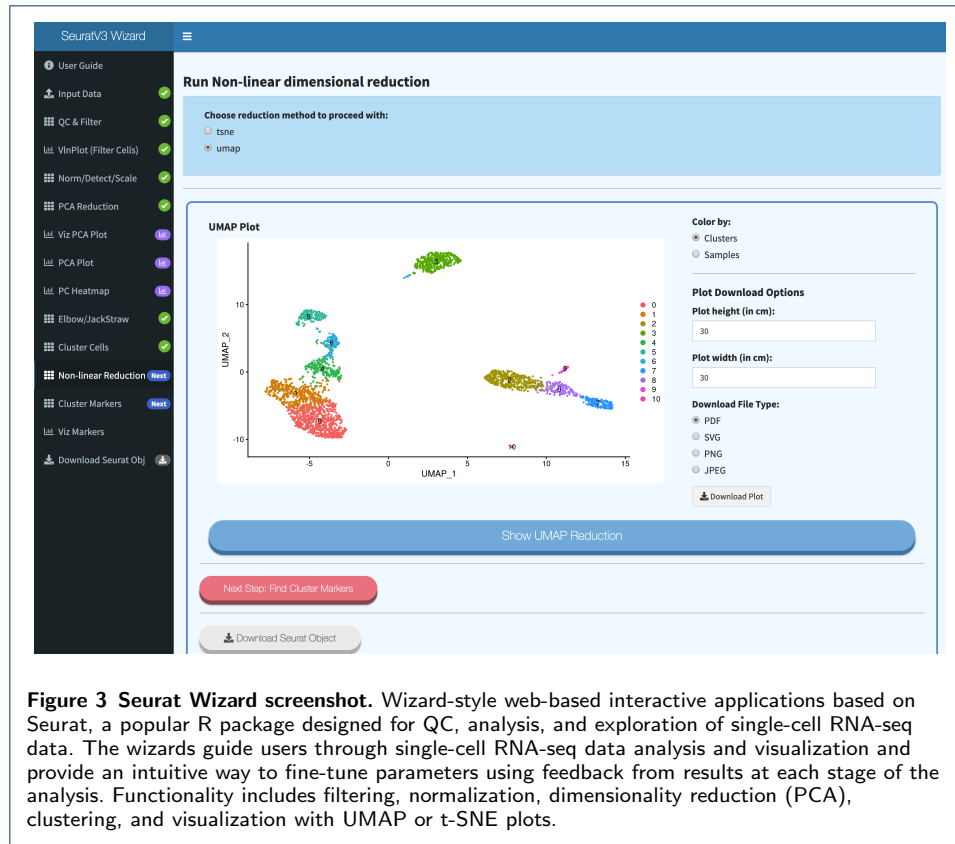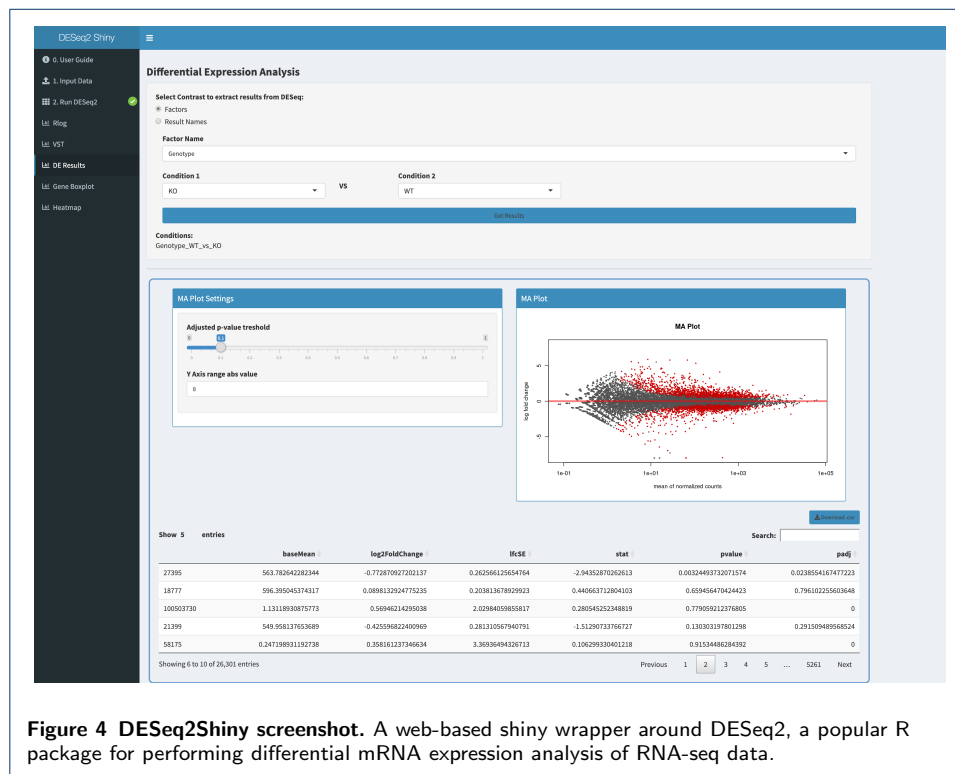

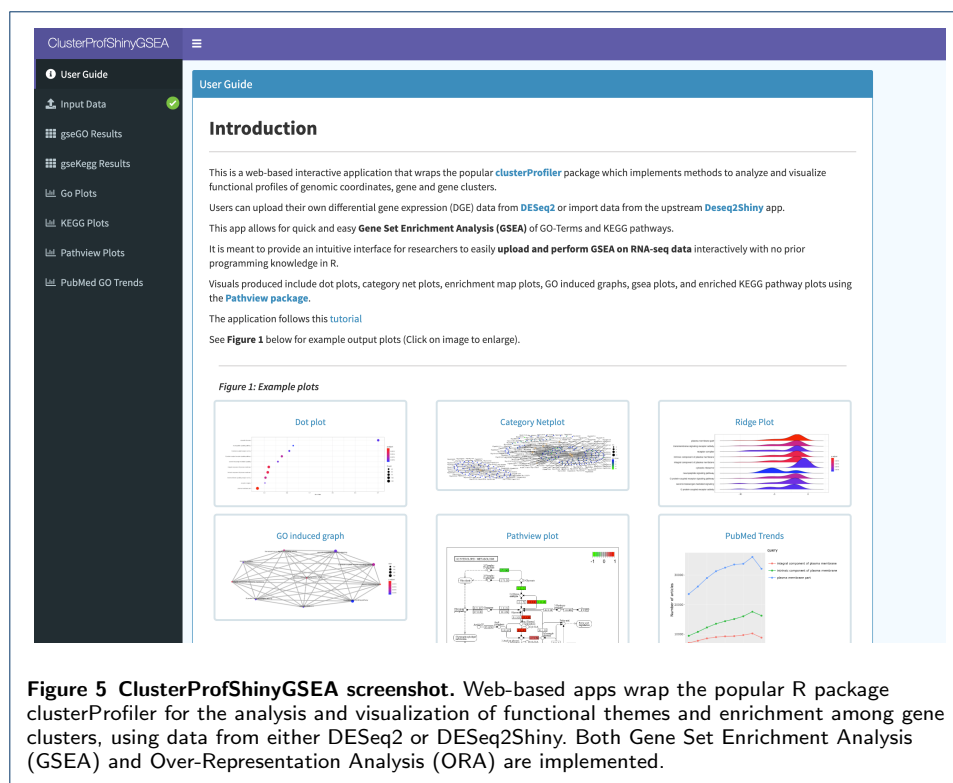

Source: https://www.biorxiv.org/content/10.1101/709980v3.full.pdf
